# Supplementary material for: Potential Consequence of Interconnected Intervention against Systemic Risk (COVID‐19) via a Model‐Driven Network‐Agent Dynamic
Source: Hindawi journal article supplement (doi:10.1155/2022/7382033), 2022-01-01
Supplement: f1 [file 7382033.f1.docx]

Supplementary Materials for

**Potential consequence of interconnected intervention against systemic risk (COVID-19) via** **a model driven network–agent dynamic**

Correspondence to: Chulwook Park ([pcw8531@snu.ac.at](mailto:pcw8531@snu.ac.at))

**This file includes:** Model mechanisms and parameter calculation

1. Mathematical mechanism of the basic network property 2
2. The SEIR Model mehcanism 3
3. Mathematical mechanism of Stationarity 5
4. Mathematical mechanisms of the non-evolutionary macroscale parameter effect 6

**Supplementary Materials Ⅰ**

***Mathematical mechanism of the basic network property:*** To quantify the probability that a node has degree for all , note that a node has degree zero if no node is connected to it, and that a node has a degree if all nodes are connected to it. For a node to have degree in a network with nodes, there must be “connections” and “nodes that are not connected to it.” Because the probability of “connecting to a node” is , the probability of “not connecting to a node” is . The outcome “heads” and “tails” occurs with probability ; however, there are “ choose ” approaches in which this outcome can occur (the order of the flip results is inconsequential). The probability that a given node has a degree is given by the binomial distribution , which is the average node degree. Note that the graph is illustrated based on how the computer generates the visuals. Each time we run the graph, we would obtain a different picture, and the relationship between the vertices (nodes) and edges (line) creating its degrees will be the same as given below.

The above equation states that twice the number of edges is equal to the sum of the degrees (i.e., E = 4 = deg = 8), as is visible for the pair of nodes. In every graph, the number of edges [] is the sum of the degree of nodes []. Depending on the degree of each node, the average path length and time between the connected nodes can be calculated. For small values , the graph shows a small number of edges, isolated clusters, and a large difference between path lengths and path times. For large values , the graph is almost complete, and the path length and time are shortened. The graph does not take very long to move, via hops, from one node to another; however, it has low average clustering.

**Supplementary Materials Ⅱ**

***The SEIR Model mechanisms***: Let us consider the spread of virus (i.e., COVID19). The population is set to N, and the results are represented in fractions of the population. At each time, the population is divided into four categories that sum to total 1 (S = susceptible, E = exposed, I = infected, R = recovered or dead). The fractions of the population evolve over time as follows:

, , ,

The parameter is the rate per day at which infected people either recover or die from the virus. It is considered a fixed parameter (set to ) reflecting an estimated duration of illness of 18 days (Atkeson, 2020). The parameter is the rate at which those exposed to the virus become infected. It is also a fixed parameter (set to ) reflecting an estimated incubation period of 4 days (i.e., COVID19). is the transmission rate. Of the people they bump into, fraction S/N are susceptible and hence transition to being exposed. is the ratio of this meeting rate and recovery + death rate on day t. This parameter governing the ratio of the rates at which those who are susceptible become infected and those who are ill either recover or die varies over time and is controlled by social distancing and quarantining.

In programing by Jupyter;

| [In]  γ = 1 / 18 # to reflect an average incubation period of 4 days.  σ = 1 / 4 # to match an average illness duration of 18 days.  def F(x, t, R0=2.2):  s, e, i, r = x  # New exposure of susceptible  β = R0(t) * γ if callable(R0) else R0 * γ  ne = β * s * i  # Time derivatives  ds = - ne  de = ne - σ * e  di = σ * e - γ * i  dr = γ*i  return ds, de, di, dr  t_length = 365*2 # 2 years investigated |
| --- |

Let us parameterize this rate to allow for an initial period of intense application of social distancing followed by a relaxation of these measures to allow economic activity to resume.

Here is the initial value of representing the spread of the disease in its initial phase. The parameters for indicate the long-term values to which converges. Thus, in the long run converges to . To get a U-shaped pattern for , we make a rapidly declining function and a slowly rising function. The parameter governs the rate at which falls toward . The parameter governs the rate at which rises toward .

In programing by Jupyter;

| [In]  def R0_mitigating(t, r0=2.2, η=1, r_bar=1.5):  R0 = r0 * exp(- η * t) + (1 - exp(- η * t)) * r_bar  return R0  η_vals = 1/5, 1/50, 1/100 |
| --- |

**Supplementary Materials Ⅲ**

***Mathematical mechanism of Stationarity***: The stationarity potential dynamic is

where denotes the force, and represents sigma. By stationarity, the result implies that all variables are almost constant with a fluctuation force around their mean value. We considered that a system with a potential that exhibits two-state levels and defined by the failure yields only the following.

Alternatively, this can be written as

With , the stationary probability is given by (i.e., , reflecting one of the simulation results of the failure)

Given that , the simulation results suggest that the state () [and the other state ()] probabilities remain constant (convergence on average).

**Supplementary Materials Ⅳ**

***Mathematical mechanisms of the non-evolutionary macroscale parameter effect:*** First, we denote the number and fraction of failed agents by and respectively. At stationarity, the average number of failed agents remains constant, as discussed above. Consider two successive steps, and . Suppose that at time , there are and failed and not failed nodes, respectively. Therefore, the number of not failed nodes at is

Further, the number of failed nodes at is

or

Indeed, stationarity implies that the number of failed (and not failed) nodes remains constant (on average). For example,

where we use

in the second equality. Further, to simplify the protection probability, we measure the fitness [] in units of . Thus, we assume as

Considering this, let us define

Then, the above formula for is as follows, which is more straightforward.

Here, denotes the average protection probability among the not failed nodes. The protection probability of the failed nodes is zero because they have no capital. In other words,

where denotes the protection probability of node . In the second equality, and are defined in the same manner. The above relationship shows that the stationary value of is a decreasing function of , and the limiting values seem promising. For , that is, full protection, there will be no failed agents and vice versa (for , i.e., no protection). All failed agents will recover at the end of each time step (it can be another main parameter) or delay. If the propagation probability is less than 1, this equation should be modified. To modify it, we need to replace by

Further, by defining

we get

Therefore, we arrive at a more general formula

This equation yields implicitly. Here, it is not possible to solve this equation and obtain an explicit closed-form for ; however, for a small propagation probability, i.e., , simple algebra leads to

Further, to correspond to the different structures of the networks, we worked with a real-world [Watts and Strogatz; with a given number of nodes, connection is rewired by probability ∈ (0,1) =] network controlled by by rewiring their connection as

Now, we calculate the average value of the capital (=immunity). First, consider the case . It can be seen that the average value of the capital satisfies

where denotes the average value of the capital among the not-failed nodes. Further, the value of c indicates that each node in the not failed state receives units of payoff that are added to the capital at each time step and its fractions and are spent on maintenance and protection, respectively, thereby resulting in the updated capital . Combining the equations of , , and , we can obtain and (protection) as a function of in the stationary state. However, it is easier to obtain as a function of , which is itself a function of .

Here, a comment on the validity of these two equations is in order. In the simulation, we use a truncation to constrain it to the interval []. This truncation is not used to obtain the above equations. Therefore, whenever leads to a value outside the truncation interval, should be considered equal to one of the endpoints of this interval. In both cases (), the average capital will be equal to .

Now, let us consider . For , the protection probability of should be replaced by

Therefore, we obtain

From a statistical point of view, there is no single network; instead, it is an ensemble of networks constructed for various realizations. All realizations were constructed using the same method. Failure is propagated through an existing link with probability corresponding to the more real property of the network.
